# Supplementary material for: A luminescence-based assay for monitoring changes in alpha-synuclein aggregation in living cells
Source: Royal Society of Chemistry journal article supplement (doi:10.1039/d0ra02720k), 2020-01-01
Supplement: d0ra02720k1.pdf [file d0ra02720k1.pdf]

## Supporting Information

### A Luminescence-Based Assay for Monitoring Changes in Alpha-Synuclein Aggregation in Living Cells

Travis J. Nelson,<sup>1,†</sup> Tiffany Truong,<sup>1,2,†</sup> BaoLong Truong,<sup>1</sup> Camden V. Bilyeu,<sup>1</sup> Jia Zhao,<sup>1</sup> and  
Cliff I. Stains<sup>1,3,4,5,6,\*</sup>

<sup>1</sup>Department of Chemistry, University of Nebraska – Lincoln, Lincoln, NE 68588, USA

<sup>2</sup>Present Address: University of Nebraska Medical Center, Omaha NE 68198, USA

<sup>3</sup>Nebraska Center for Integrated Biomolecular Communication, University of Nebraska –  
Lincoln, Lincoln, NE 68588, USA

<sup>4</sup>Cancer Genes and Molecular Regulation Program, Fred & Pamela Buffet Cancer Center,  
University of Nebraska Medical Center, Omaha NE 68198, USA

<sup>5</sup>Department of Chemistry, University of Virginia, Charlottesville, VA, 22904

<sup>6</sup>University of Virginia Cancer Center, University of Virginia, Charlottesville, VA, 22904

<sup>†</sup>These authors contributed equally.

\*E-mail: cstains@virginia.edu

#### Contents

|                 |   |
|-----------------|---|
| Methods.....    | 2 |
| Figure S1.....  | 4 |
| Figure S2.....  | 5 |
| Figure S3.....  | 6 |
| Table S1.....   | 7 |
| References..... | 8 |

## Methods

**Cloning:** Expression vectors containing unfused N65 (pET-45b) and 66C (pRSF-1b) have been previously described.<sup>1</sup> A DNA sequence encoding WT- $\alpha$ SYN was cloned into a pET-45b vector (Novagen, 71553) containing the N65 sequence using 5' PshAI and 3' BglIII restriction sites and was verified by DNA sequencing. Using the resulting WT- $\alpha$ SYN-N65 as a template,  $\alpha$ SYN mutants were generated using site-directed mutagenesis (QuikChange Lightning Multi-Site Directed Mutagenesis Kit, Agilent, 210515) according to manufacturer protocols and were verified by DNA sequencing.

**Preparation of EGCG stock:** EGCG (Cayman Chemical, 70935) was prepared at 100 mM in DMSO.

**Preparation of D-mannitol containing media:** Flasks containing terrific broth (TB, 100 mL) liquid culture media were prepared according to manufacturer protocols. D-mannitol was added to the indicated final concentration. Control TB media was also prepared without D-mannitol. The resulting media was then autoclaved prior to use below.

**Luminescence solubility assays:** Assays were conducted as previously described.<sup>2</sup> BL21-Gold(DE3) (Agilent, 230132) cells were transformed with the indicated constructs described above and were grown to confluency overnight in TB (5 mL) with shaking at 37 °C in the presence of ampicillin (100  $\mu$ g/mL) and kanamycin (50  $\mu$ g/mL). The optical density of each culture was measured at 600 nm and cultures were diluted to an  $OD_{600} = 0.1$  in TB or TB containing D-mannitol as indicated. The cells were then grown with shaking at 37 °C until an  $OD_{600} = 0.6 - 0.8$  was reached. Cultures were induced with IPTG (0.2 mM) and EGCG was added where indicated. Cultures were incubated overnight at 16 °C with shaking. The next morning, the  $OD_{600}$  of each culture was measured and normalized to 3.0 in 1 mL. Cells were harvested by centrifugation at 700g for 10 min at 4 °C and resuspended in 200  $\mu$ L of 1 $\times$  Nluc assay buffer (50 mM MES pH = 6.0, 0.5 mM EDTA, 75 mM KCl, 1 mM 2-mercaptoethanol, and 17.5 mM thiourea). The cells were then mixed with an equal volume (200  $\mu$ L) of 1 $\times$  Nluc buffer containing 50  $\mu$ M coelenterazine

(GoldBio, CZ2.5, prepared as a 2.5 mM stock in acidified ethanol). The resulting assay mixtures were then loaded into a Corning 384-well assay plate (3824, white, low volume, flat bottom, 40  $\mu$ L reaction volume). Luminescence intensities were determined using a SynergyH1 hybrid reader (BioTek) at 30 minutes after substrate addition.

## Figure S1

**a**

*α*SYN Sequence

MDVFMKGLSKAKEGVVAAAEKTKQGVAEAAGKTKEGVLYVGSKTKEGVWHGVA  
TVAEKTKEQVTNVGGAVVTGVTAVAQKTVEGAGSIAAATGFVKKDDLQGNNEGA  
PQEGILEDMPVDPDNEAYEMPSEEGYQDYEPEA

**b**

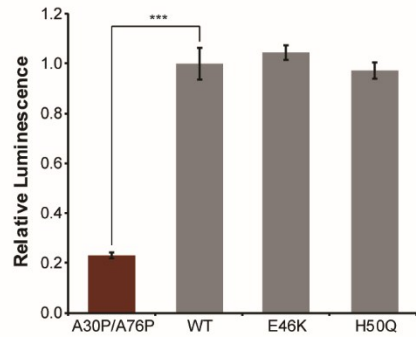

Mutations that increase oligomer formation lead to decreased luminescence. a) The amino acid sequence of  $\alpha$ SYN is shown with mutation sites indicated in red. b) Luminescence from bacterial cells expressing the indicated mutant or wild-type (WT)  $\alpha$ SYN fused to N65 in the presence of 66C. Error bars represent the standard deviation of two (A30P/A76P) or three (WT, E46K, and H50Q) biological replicates assayed in triplicate. \*\*\* indicates a p-value of <0.001.

**Figure S2**

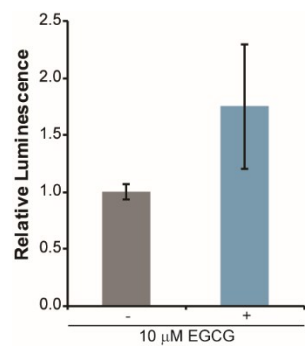

Increasing the concentration of EGCG does not lead to a significant increase in luminescence relative to 1 μM EGCG (Fig. 3c). Error bars represent the standard deviation of three biological replicates assayed in triplicate.

**Figure S3**

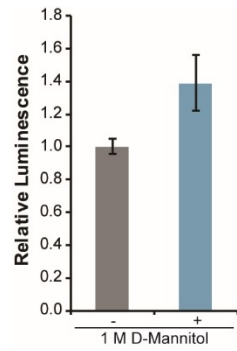

Increasing the concentration of D-mannitol results in a decrease in luminescence relative to 0.5 M D-mannitol (Fig. 3d). Error bars represent the standard deviation of two biological replicates assayed in triplicate.

**Table S1: Amino Acid Sequences for Constructs Used in This Work**

| <b>Protein</b>                       | <b>Amino Acid Sequence</b>                                                                                                                                                                                                                                                                                                                             |
|--------------------------------------|--------------------------------------------------------------------------------------------------------------------------------------------------------------------------------------------------------------------------------------------------------------------------------------------------------------------------------------------------------|
| <b>WT-<math>\alpha</math>SYN-N65</b> | <u>MAHHHHHHVGTGSNDDDDKSPMDVFMKGLSKAKEGVVAAA</u> <u>EKTQGVAEA</u><br><u>AGKTKEGVLVYVGSKTKEGVVHG</u> <u>VATVAEKTKEQVTNVGGAVVTGVTAVAQ</u><br><u>KTVEGAGSIAAATGFVKKDQLGKNEEGAPQEGILEDMPVDPDNEAYEMPS</u><br><u>EEGYQDYEP</u> <u>EAQISYASRGGGSSGGGELMVFTLEDFVGDWRQTAGYNLDQ</u><br><u>VLEQGGVSSLFQNLGVS</u> <u>VTPIQRIVLSGENGLKIDIHVIIPYE</u>                 |
| <b>A30P-N65<sup>a</sup></b>          | <u>MAHHHHHHVGTGSNDDDDKSPMDVFMKGLSKAKEGVVAAA</u> <u>EKTQGVAEA</u><br><u>PGKTKEGVLVYVGSKTKEGVVHG</u> <u>VATVAEKTKEQVTNVGGAVVTGVTAVAQ</u><br><u>KTVEGAGSIAAATGFVKKDQLGKNEEGAPQEGILEDMPVDPDNEAYEMPS</u><br><u>EEGYQDYEP</u> <u>EAQISYASRGGGSSGGGELMVFTLEDFVGDWRQTAGYNLDQ</u><br><u>VLEQGGVSSLFQNLGVS</u> <u>VTPIQRIVLSGENGLKIDIHVIIPYE</u>                 |
| <b>A53T-N65<sup>a</sup></b>          | <u>MAHHHHHHVGTGSNDDDDKSPMDVFMKGLSKAKEGVVAAA</u> <u>EKTQGVAEA</u><br><u>AGKTKEGVLVYVGSKTKEGVVHG</u> <u>VATVAEKTKEQVTNVGGAVVTGVTAVAQ</u><br><u>KTVEGAGSIAAATGFVKKDQLGKNEEGAPQEGILEDMPVDPDNEAYEMPS</u><br><u>EEGYQDYEP</u> <u>EAQISYASRGGGSSGGGELMVFTLEDFVGDWRQTAGYNLDQ</u><br><u>VLEQGGVSSLFQNLGVS</u> <u>VTPIQRIVLSGENGLKIDIHVIIPYE</u>                 |
| <b>G51D-N65<sup>a</sup></b>          | <u>MAHHHHHHVGTGSNDDDDKSPMDVFMKGLSKAKEGVVAAA</u> <u>EKTQGVAEA</u><br><u>AGKTKEGVLVYVGSKTKEGVVH</u> <u>DVATVAEKTKEQVTNVGGAVVTGVTAVAQ</u><br><u>KTVEGAGSIAAATGFVKKDQLGKNEEGAPQEGILEDMPVDPDNEAYEMPS</u><br><u>EEGYQDYEP</u> <u>EAQISYASRGGGSSGGGELMVFTLEDFVGDWRQTAGYNLDQ</u><br><u>VLEQGGVSSLFQNLGVS</u> <u>VTPIQRIVLSGENGLKIDIHVIIPYE</u>                 |
| <b>A30P/A76P-N65<sup>a</sup></b>     | <u>MAHHHHHHVGTGSNDDDDKSPMDVFMKGLSKAKEGVVAAA</u> <u>EKTQGVAEA</u><br><u>PGKTKEGVLVYVGSKTKEGVVHG</u> <u>VATVAEKTKEQVTNVGGAVVTGVT</u> <u>PVAQ</u><br><u>KTVEGAGSIAAATGFVKKDQLGKNEEGAPQEGILEDMPVDPDNEAYEMPS</u><br><u>EEGYQDYEP</u> <u>EAQISYASRGGGSSGGGELMVFTLEDFVGDWRQTAGYNLDQ</u><br><u>VLEQGGVSSLFQNLGVS</u> <u>VTPIQRIVLSGENGLKIDIHVIIPYE</u>         |
| <b>E46K-N65<sup>a</sup></b>          | <u>MAHHHHHHVGTGSNDDDDKSPMDVFMKGLSKAKEGVVAAA</u> <u>EKTQGVAEA</u><br><u>AGKTKEGVLVYVGSKT</u> <u>KG</u> <u>VVHG</u> <u>VATVAEKTKEQVTNVGGAVVTGVTAVAQ</u><br><u>KTVEGAGSIAAATGFVKKDQLGKNEEGAPQEGILEDMPVDPDNEAYEMPS</u><br><u>EEGYQDYEP</u> <u>EAQISYASRGGGSSGGGELMVFTLEDFVGDWRQTAGYNLDQ</u><br><u>VLEQGGVSSLFQNLGVS</u> <u>VTPIQRIVLSGENGLKIDIHVIIPYE</u>  |
| <b>H50Q-N65<sup>a</sup></b>          | <u>MAHHHHHHVGTGSNDDDDKSPMDVFMKGLSKAKEGVVAAA</u> <u>EKTQGVAEA</u><br><u>AGKTKEGVLVYVGSKTKEGVV</u> <u>Q</u> <u>G</u> <u>VATVAEKTKEQVTNVGGAVVTGVTAVAQ</u><br><u>KTVEGAGSIAAATGFVKKDQLGKNEEGAPQEGILEDMPVDPDNEAYEMPS</u><br><u>EEGYQDYEP</u> <u>EAQISYASRGGGSSGGGELMVFTLEDFVGDWRQTAGYNLDQ</u><br><u>VLEQGGVSSLFQNLGVS</u> <u>VTPIQRIVLSGENGLKIDIHVIIPYE</u> |
| <b>66C</b>                           | <u>MGGLSGDQMGQIEKIFKV</u> <u>VYPVDDH</u> <u>HFVILHYGTLVIDGVT</u> <u>PNMIDYFG</u><br><u>RPYEGIAVFDGKKITVTGTLWNGNKI</u> <u>IDERLINPDG</u> <u>SLLFRV</u> <u>TINGVTGW</u><br><u>RLCERILALQGSELHHHHH</u>                                                                                                                                                    |

Amino acid sequences of aggregating proteins are underlined. <sup>a</sup>The point mutations of  $\alpha$ SYN are denoted in red.

## References

1. J. Zhao, T. J. Nelson, Q. Vu, T. Truong and C. I. Stains, *ACS Chem. Biol.*, 2016, **11**, 132-138.
2. T. J. Nelson, J. Zhao and C. I. Stains, *Methods Enzymol.*, 2019, **622**, 55-66.
